# Supplementary material for: The MODY-associated TALK-1 L114P mutation causes islet α-cell overactivity and β-cell inactivity resulting in transient neonatal diabetes and glucose dyshomeostasis in adults
Source: PubMed Central journal article supplement (PMC10401960; doi:10.1101/2023.06.20.545631), 2023-07-26
Supplement: media-1.pdf [file media-1.pdf]

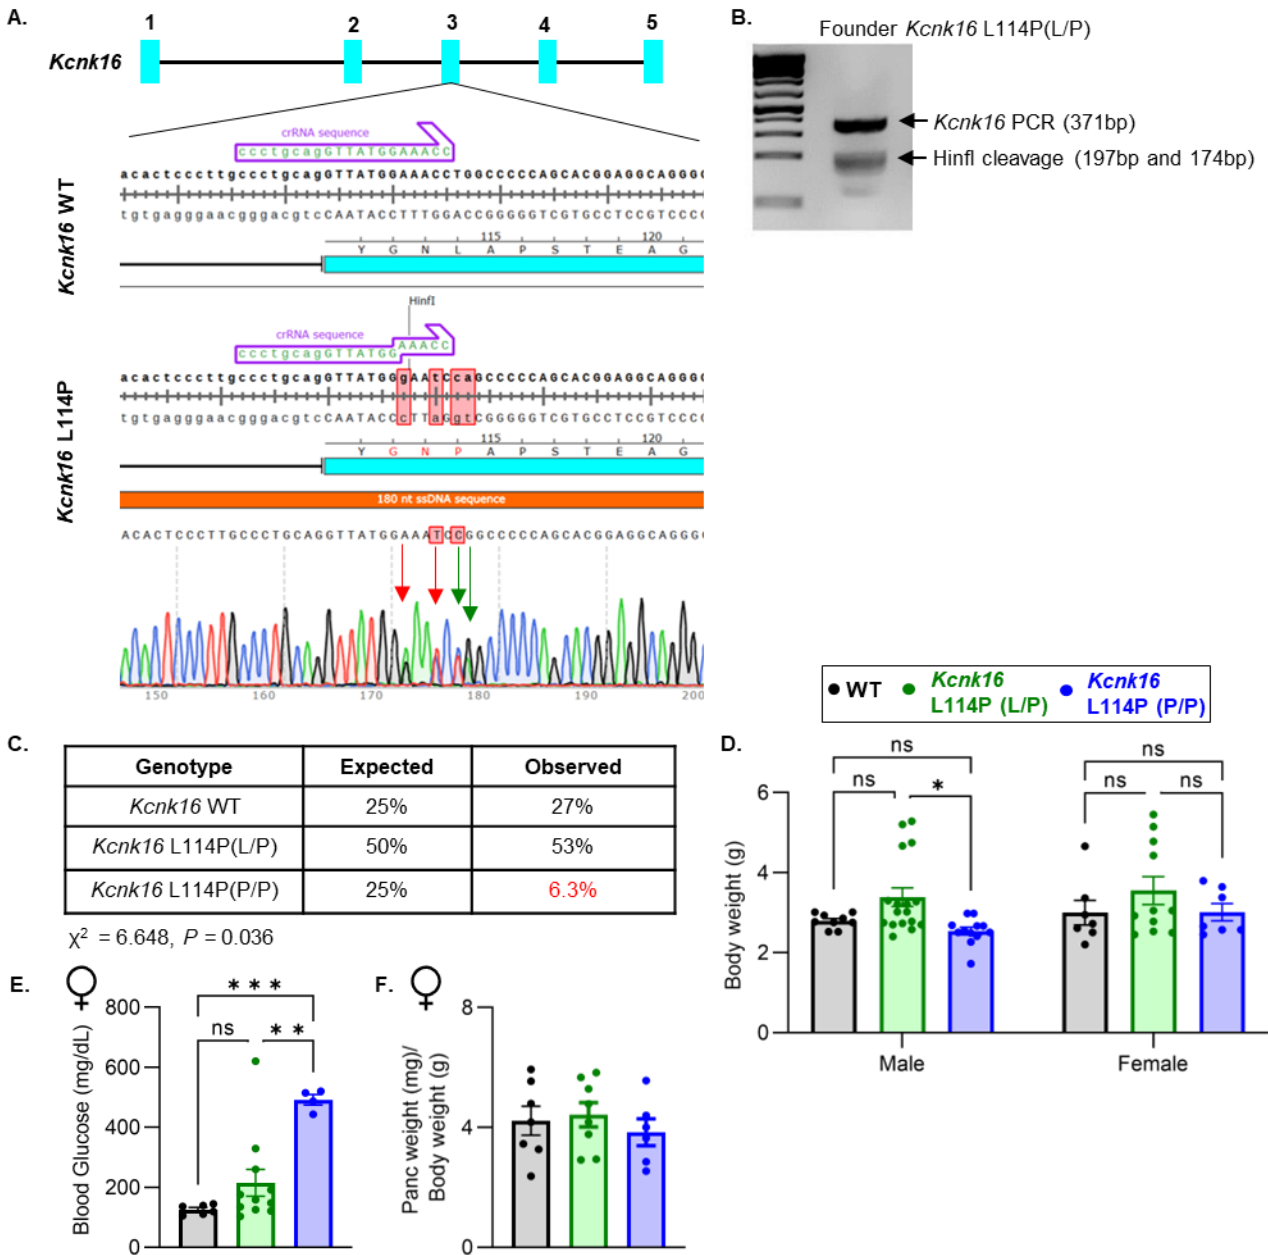

**Supplemental figure 1. Generation of *Kcnk16* L114P model and assessment of neonatal glucose homeostasis and lethality.** A. Targeted region of *Kcnk16* exon 3 using CRISPR/Cas9 leading to the introduction of *Hinfi* restriction enzyme site (red arrows) and CTG to CCA mutation in codon 337 corresponding to p.TALK-1 L114P (green arrows). B. PCR confirmation of the male founder *Kcnk16* L114P (L/P) mouse using *Hinfi*

restriction digestion. C.  $\chi^2$  analysis of the F1 progeny from B6; CD-1 *Kcnk16* L114P (L/P) crosses. D. Body weight measurements of male (left) and female (right) wildtype (WT; black), heterozygous *Kcnk16* L114P (L/P; green), and homozygous *Kcnk16* L114P (P/P; blue) mice on P4. E. Blood glucose measurements of female mice on P4. F. Pancreas weight/ body weight measurements of P4 female mice. Data are presented as mean $\pm$ SEM. Data were analyzed using student's t-test or one-way ANOVA.

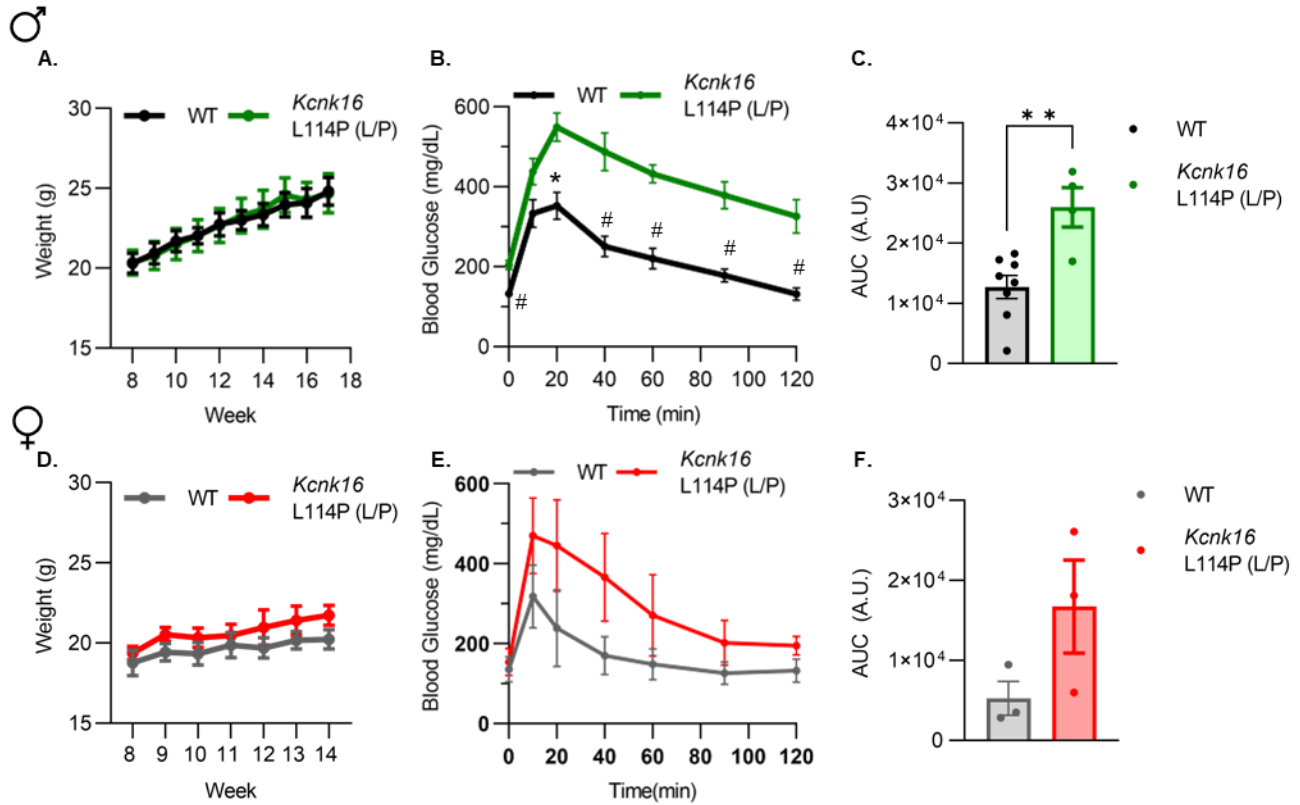

**Supplemental figure 2. Glucose homeostasis is also impaired in the *Kcnk16* L114P (L/P) mice in the B6 background.** A. Body weight measurements of male WT (black; N=8) and *Kcnk16* L114P (L/P; green; N=4) mice in the C57Bl/6J background. B. Intraperitoneal glucose tolerance test (i.p. GTT) performed in 10-week-old male mice following a 4-hour fast in response to 2mg/g glucose injection. C. Average AUC of the 2-hr GTT excursion profiles in (c). D. Body weight measurements of female WT (gray; N=3) and *Kcnk16* L114P (L/P; red; N=3) mice. E. I.P. GTT performed in 11-week-old female mice following a 4-hour fast in response to 2mg/g glucose injection. F. Average AUC of the 2-hr GTT excursion profiles in (E). Data are presented as mean±SEM. Data were analyzed using student's t-test; \*\*P<0.01, #P<0.001.

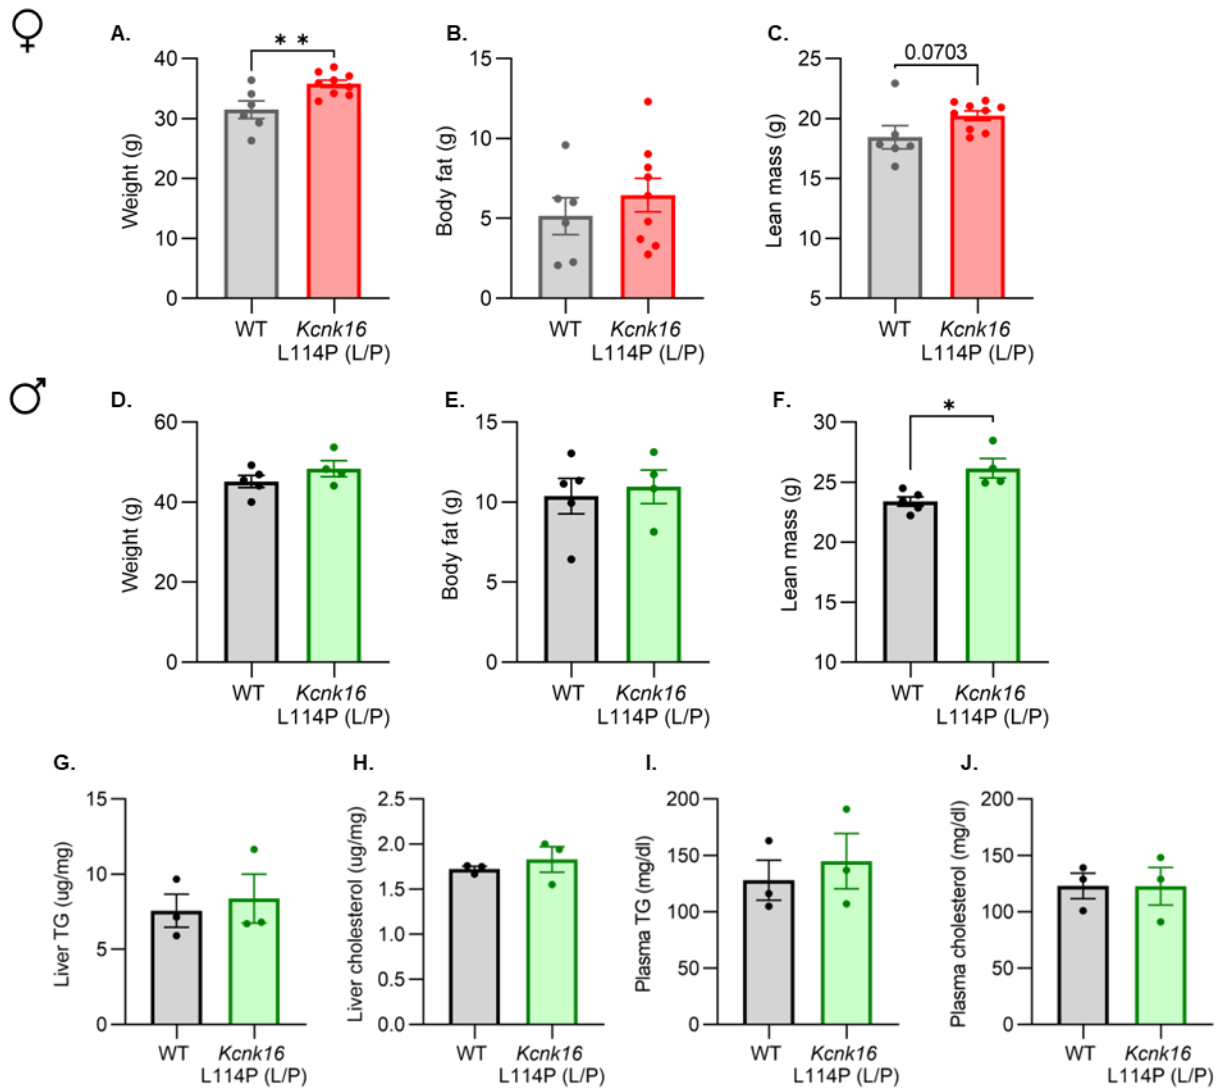

**Supplemental figure 3. Body composition measurements and assessment of plasma and liver triglycerides and total cholesterol.** A.-F. Body composition analysis of male and female B6; CD-1 WT and *Kcnk16* L114P (L/P) mice assessing weight (g), body fat (g), and lean mass (g) (N=5-9 mice/genotype). G.-J. Average liver and plasma cholesterol and triglyceride levels in male B6; CD-1 WT and *Kcnk16* L114P (L/P) mice (N=3/genotype). Data are presented as mean±SEM. Data were analyzed using student's t-test.

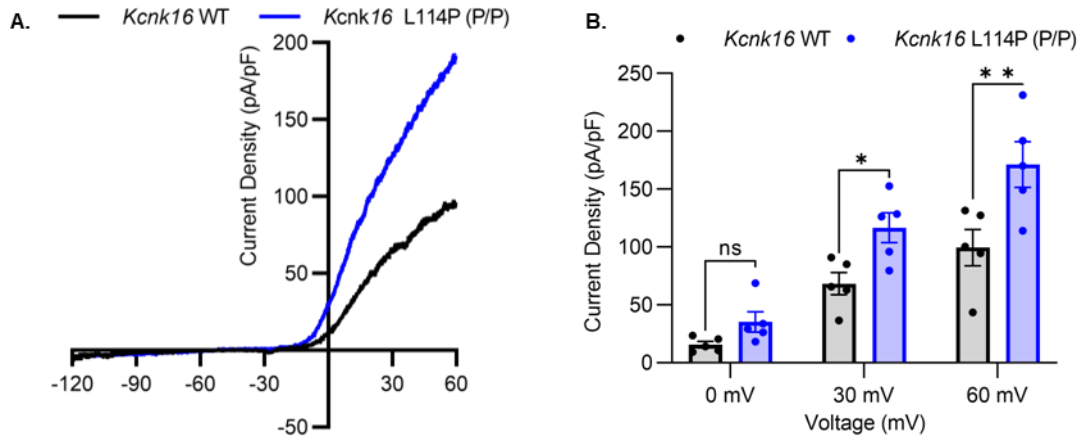

**Supplemental figure 4. K2P currents in  $\beta$ -cells from homozygous *Kcnk16* L114P (P/P) mice also exhibit a modest increase.** A. Representative whole-cell K2P current density (pA/pF) recorded using a voltage ramp (-120 mV to +60 mV) in 11 mM G in islets from B6; CD-1 WT and *Kcnk16* L114P (P/P) P4 neonates. B. Average current density (pA/pF) measured at the specified membrane potentials (N=5 cells/genotype). Data are presented as mean $\pm$ SEM. Data were analyzed using two-way ANOVA.

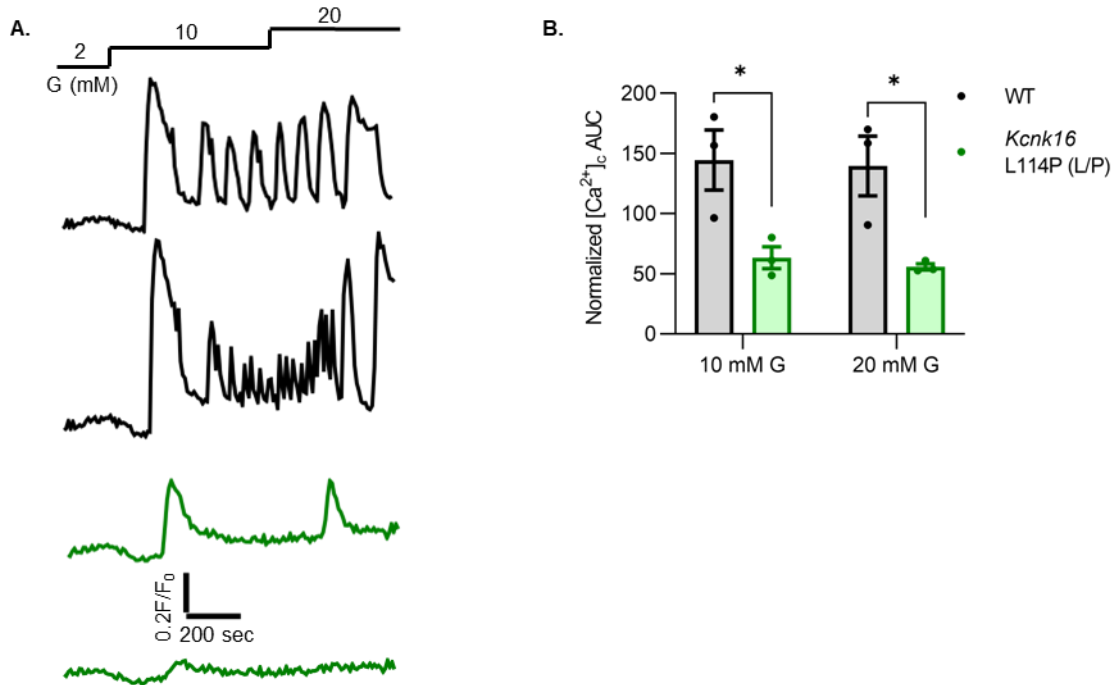

**Supplemental figure 5. Islets from *Kcnk16* L114P (L/P) mice on the B6 background also exhibit blunted glucose-stimulated Ca<sup>2+</sup> entry.** A. Representative GSCI traces in islets from male WT and *Kcnk16* L114P(L/P) mice in the C57BL/6J background in response to 2 mM G, 10 mM G, and 20 mM G (N=3 mice/genotype). B. Average total AUC in response to the indicated glucose concentrations in islets from male WT and *Kcnk16* L114P(L/P) mice. Data are presented as mean ± SEM. Data are analyzed using student's t-test.

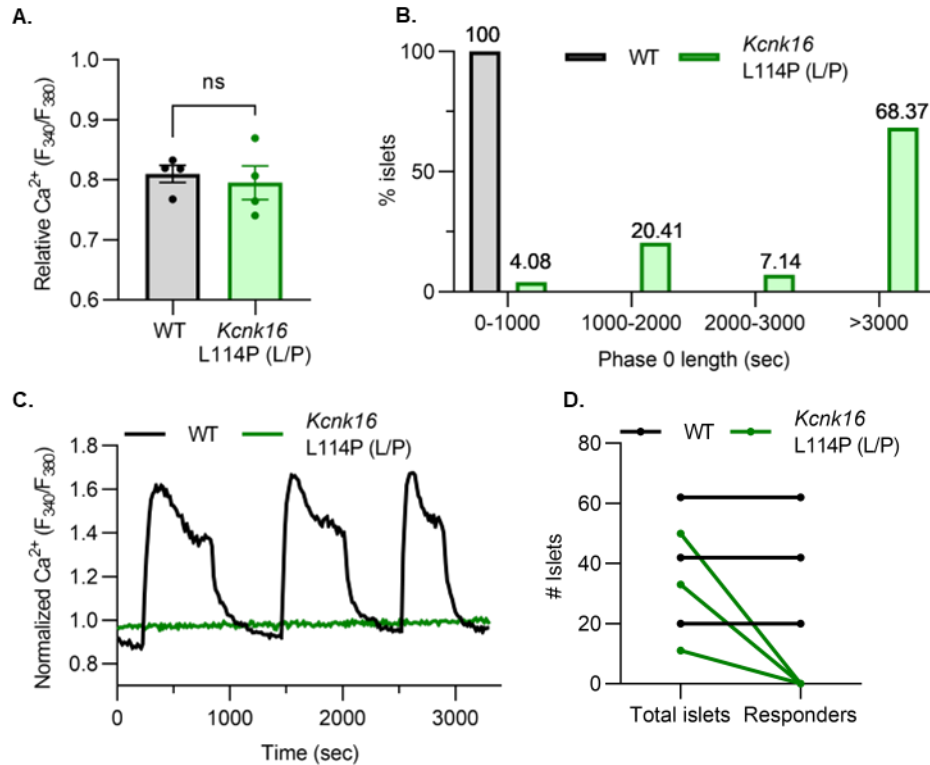

**Supplemental figure 6. *Kcnk16* L114P (L/P) islets exhibit prolonged glucose-stimulated phase 0  $[Ca^{2+}]_{ER}$  uptake and show a complete absence of  $Ca^{2+}$  oscillations.** A. Average relative  $[Ca^{2+}]_c$  at 2 mM G in islets from B6; CD-1 WT and *Kcnk16* L114P (L/P) mice (N=4 mice/genotype). B. Percent islets that exhibit the corresponding phase 0 response length (sec) in WT and *Kcnk16* L114P (L/P) mice. C. Representative glucose-stimulated  $[Ca^{2+}]_c$  oscillations recorded at 9 mM G in islets from WT and *Kcnk16* L114P (L/P) mice. D. Total number of islets analyzed for  $[Ca^{2+}]_c$  oscillations vs. the number of islets that exhibited  $[Ca^{2+}]_c$  oscillations from WT and *Kcnk16* L114P (L/P) mice (N=3 mice/genotype). Data are presented as mean $\pm$ SEM. Data are analyzed using student's t-test.

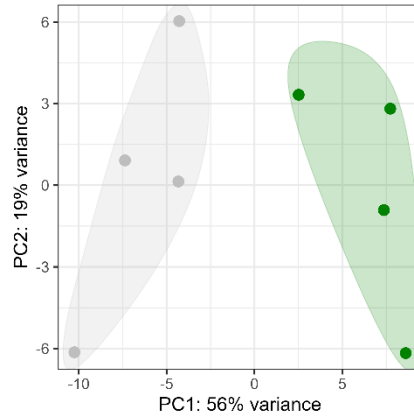

**Supplemental figure 7. Principal component analysis (PCA) showing clustering of WT (gray) and *Kcnk16* L114P (L/P; green) islet RNA samples.**



| <b>Gene</b>      | <b>Forward primer</b>  | <b>Reverse primer</b>   |
|------------------|------------------------|-------------------------|
| <i>18sRNA</i>    | GTAACCCGTTGAACCCATT    | CCATCCAATCGGTAGTAGCG    |
| <i>Cacna1g</i>   | GAGACACAGAGTACGGGAGC   | CAGGCATTCATGGTCAGCG     |
| <i>Sst</i>       | CCACCGGGAAACAGGAACTG   | TTGCTGGGTTTCGAGTTGGC    |
| <i>Asb11</i>     | TGGTGGACTGTCAGACTGCT   | ATTGACGTTGATGCCTTGCG    |
| <i>Fxyd3</i>     | ACTCTGCTTTCTCCCGAAC    | CTCGGAGGCTGTACCAATCATA  |
| <i>Aldh1a3</i>   | GGGTCACACTGGAGCTAGGA   | CTGGCCTCTTCTTGCGGAA     |
| <i>Camk1d</i>    | CCGCCCTACAGCATTAGTCT   | GAAAAGGCCCCAGTTCCGA     |
| <i>Cxcl1</i>     | ACCCAAACCGAAGTCATAGCC  | TTGTCAGAAGCCAGCGTTCA    |
| <i>Adcyap1r1</i> | CTGCGTGCAGAAATGCTACTG  | AGCCGTAGAGTAATGGTGGATAG |
| <i>Aldob</i>     | AGAAGGACAGCCAGGAAAT    | G TTCAGAGAGGCCATCAAGC   |
| <i>Pdk4</i>      | TGGTAGCAGTAGTCCAAGATGC | GTGGATTGGTTGGCCTGGAA    |
| <i>Tgfb2</i>     | TCGACATGGATCAGTTTATGCG | CCCTGGTACTGTTGTAGATGGA  |

**Supplemental table 1. Mouse primer sequences used for qRT-PCR.**
